# Supplementary material for: Imidacloprid Disturbs the Nitrogen Metabolism and Triggers an Overall Stress Response in Maize Seedlings
Source: MDPI journal article supplement (doi:10.3390/agronomy12123161), 2022-12-13
Supplement: s1 [file s1]

Supplementary Table S1. Primers used in this study

| Primer name   | Sequence 5' to 3'        |
|---------------|--------------------------|
| ZmNR-F        | GTGCATGATAAACGAGCTGAAC   |
| ZmNR-R        | CGGAGTATGCGTATCCTTTGAT   |
| ZmNiR-F       | CCATCCACGGTTTGTTGTAAAG   |
| ZmNiR-R       | TTCTCTGTGACGTGAATAAGGG   |
| ZmGS2-F       | CTCGGGCTCTGCTCTATTTATG   |
| ZmGS2-R       | CGCGAGTGAGTGTGATTGA      |
| ZmUMT-F       | CACCTCAACAACGAATGGTG     |
| ZmUMT-R       | CTGGCTTCACTTGCATACGA     |
| ZmSUMT-F      | GATCCTGAATGGCGGATGGT     |
| ZmSUMT-R      | CCGCACGTACATGGCTACTA     |
| ZmD1protein-F | TGGGAAGCTGCATCTGTTGA     |
| ZmD1protein-R | CGCATACCCAGACGGAAACT     |
| ZmD2protein-F | CTACCACGTGGAAACGCTCT     |
| ZmD2protein-R | TCTGGTACGAAATGGGCCAC     |
| ZmNRT2.3-F    | CTTCCACGGATCCAAGTACAA    |
| ZmNRT2.3-R    | GGGAAGTAGATGAGCGTGATG    |
| ZmNRT1.1-F    | ACGACGACTATGAACGACGC     |
| ZmNRT1.1-R    | CCGAGGAGGCATAGCATGAA     |
| ZmNRT2.1-F    | CCATGGCGGCTTTCCTATAA     |
| ZmNRT2.1-R    | GGTGATGTATCCCTTTCCTTG    |
| ZmGOGAT1-F    | CAAGATCAGAGGCTGAGTTTGA   |
| ZmGOGAT1-R    | CTCTCTCCACCACGCTTAATG    |
| Zmy-GCS1-F    | CGCTCCTCTCGAAACATTACA    |
| Zmy-GCS1-R    | GAAAGCCAAGCCCAAGAAATC    |
| ZmGST 34-F    | GACCTATGGGTCGTTCTCTTAATC |
| ZmGST 34-R    | CTACATGCTATTGACGGTGACA   |
| ZmGST 7-F     | GGTGCAAACCGCTTGTTTATC    |
| ZmGST 7-R     | GTCAACTCCGGTAGCTGATTTAT  |
| ZmGST-F       | GTGGTTGACGAAGGTGAGTT     |
| ZmGST-R       | CGCCTCCTTCCTTTCAGTATAG   |
| ZmABCB9-F     | AGGATGCCATTGGTGAGAAG     |
| Zm ABCB9-R    | TGCCAGCATGACAAGAGATAG    |
| Zm ABCC3-F    | GAAAGGGAGAGTGGTCAAGTAAG  |
| Zm ABCC3-R    | CAAAGGAAACCATGCCCATAAC   |
| ZmMRP4-F      | TGCCAGATGACGCAACTATAA    |
| ZmMRP4-R      | CAGAGTGATGGGTTCCAAGAG    |
| ZmNLP3-F      | GTCAAGGCGAGCTACAGAGG     |
| ZmNLP3-R      | GACAAGAGCACCCACTCGTT     |
| ZmNIGT-F      | CTCAAGCCCACAACCCTCTC     |
| ZmNIGT-R      | GCGACGGTGTTCAAGGTAGT     |
| ZmTGA4-F      | CTCCTGAAGAGCACCTG        |
| ZmTGA4-R      | CCCTCGTAGATTGGCACA       |
| Zmactin-F     | GATTCCTGGGATTGCCGAT      |
| Zmactin-R     | TCTGCTGCTGAAAAGTGCTGAG   |
